# Supplementary material for: Determination of the multiple-scattering correction factor and its cross-sensitivity to scattering and wavelength dependence for different AE33 Aethalometer filter tapes: A multi-instrumental approach
Source: Copernicus journal article supplement (doi:10.5194/amt-2021-46), 2021-03-29
Supplement: Supplementary file [file amt-2021-46-AC1-supplement.pdf]

***Referee comment on "Determination of the multiple-scattering correction factor and its cross-sensitivity to scattering and wavelength dependence for different AE33 Aethalometer filter tapes: A multi-instrumental approach" by Jesús Yus-Díez et al., Atmos. Meas. Tech. Discuss., <https://doi.org/10.5194/amt-2021-46-RC3>, 2021***

### **Answer from the authors to referee #1**

On behalf of all the authors of the manuscript, we would like to acknowledge the work done in the review as well as the suggestions and comments for improving the study.

Hereafter we will answer and resolve the comments. Any minor comment, typo or writing corrections will be directly corrected in the manuscript.

**Please check second Ramanathan's reference. It is shown as published in 2020, when it was actually published in 2001.**

Checked and corrected.
